# Supplementary material
Source: publisher site journal article supplement (https://www.spandidos-publications.com/7734/downloadSupplementary)
Supplement: Supplementary file [file downloadSupplementary]

Table S1. List of differentially expressed genes of BeWo asprosin-treated cells.

| NM Number    | Gene     |
|--------------|----------|
| NM_019058    | DDIT4    |
| NM_005860    | FSTL3    |
| NM_006516    | SLC2A1   |
| NM_030916    | NECTIN4  |
| NM_001256310 | GLS      |
| NM_021939    | FKBP10   |
| NM_018660    | ZNF395   |
| NM_002928    | RGS16    |
| NR_027260    | RN7SL2   |
| NM_017789    | SEMA4C   |
| NM_138383    | MTSS2    |
| NM_003400    | XPO1     |
| NM_130807    | MOB3A    |
| NM_003714    | STC2     |
| NM_000189    | HK2      |
| NM_178493    | NOTUM    |
| NM_033505    | SELENOI  |
| NM_017510    | TMED9    |
| NM_020650    | RCN3     |
| NR_002715    | RN7SL1   |
| NM_003566    | EEA1     |
| NM_016545    | IER5     |
| NM_017801    | CMTM6    |
| NM_004864    | GDF15    |
| NM_031476    | CRISPLD2 |
| NM_012288    | TRAM2    |
| NM_016343    | CENPF    |
| NM_016531    | KLF3     |
| NM_030755    | TMX1     |
| NM_153690    | FAM43A   |
| NM_005567    | LGALS3BP |
| NM_001071775 | MZT1     |
| NM_017892    | PRPF40A  |
| NM_052905    | FMNL2    |
| NM_001017995 | SH3PXD2B |
| NM_021623    | PLEKHA2  |
| NM_001144952 | SDK2     |
| NM_147156    | SGMS1    |
| NM_006854    | KDEL2    |
| NM_002087    | GRN      |
| NM_020726    | NLN      |

|           |          |
|-----------|----------|
| NM_021149 | COTL1    |
| NM_024329 | EFHD2    |
| NM_178815 | ARL5B    |
| NM_005895 | GOLGA3   |
| NM_003394 | WNT10B   |
| NM_006423 | RABAC1   |
| NM_015111 | N4BP3    |
| NM_022166 | XYLT1    |
| NM_006844 | ILVBL    |
| NM_018353 | MIS18BP1 |

Table II. List of differentially expressed genes of JEG-3 asprosin-treated cells.

| <b>NM Number:</b> | <b>Gene:</b> |
|-------------------|--------------|
| NM_004052         | BNIP3        |
| NM_006516         | SLC2A1       |
| NM_018660         | ZNF395       |
| NM_019058         | DDIT4        |
| NM_000700         | ANXA1        |
| NM_004331         | BNIP3L       |
| NM_198182         | GRHL1        |
| NM_005911         | MAT2A        |
| NM_000189         | HK2          |
| NM_145257         | CCSAP        |
| NM_017644         | KLHL24       |
| NM_002166         | ID2          |
| NM_004415         | DSP          |
| NM_001795         | CDH5         |
| NM_022051         | EGLN1        |
| NM_005415         | SLC20A1      |
| NM_001620         | AHNAK        |
| NM_153252         | BRWD3        |
| NM_002332         | LRP1         |
| NM_004354         | CCNG2        |
| NM_017922         | PRPF39       |
| NM_006931         | SLC2A3       |
| NM_002276         | KRT19        |
| NM_005558         | LAD1         |
| NM_080725         | SRXN1        |
| NM_015021         | ZNF292       |
| NM_016639         | TNFRSF12A    |
| NM_001012642      | GRAMD2A      |
| NM_030625         | TET1         |
| NM_003714         | STC2         |
| NM_006763         | BTG2         |
| NM_002467         | MYC          |
| NR_024278         | LOC646762    |
| NM_006310         | NPEPPS       |
| NM_006328         | RBM14        |
| NM_006909         | RASGRF2      |

|              |          |
|--------------|----------|
| NM_014877    | HELZ     |
| NM_005559    | LAMA1    |
| NM_014819    | PJA2     |
| NM_001376    | DYNC1H1  |
| NM_002521    | NPPB     |
| NM_001961    | EEF2     |
| NM_031407    | HUWE1    |
| NM_000876    | IGF2R    |
| NM_005686    | SOX13    |
| NM_014423    | AFF4     |
| NM_002928    | RGS16    |
| NM_018948    | ERRFI1   |
| NM_006813    | PNRC1    |
| NM_024769    | CLMP     |
| NM_004669    | CLIC3    |
| NM_020338    | ZMIZ1    |
| NM_001287491 | TET3     |
| NM_015169    | RRS1     |
| NM_139265    | EHD4     |
| NM_001999    | FBN2     |
| NM_001605    | AARS1    |
| NM_015057    | MYCBP2   |
| NM_016604    | KDM3B    |
| NM_020143    | PNO1     |
| NR_026846    | ANAPC1P2 |
| NM_021239    | RBM25    |
| NM_001013690 | FIGNL2   |
| NM_001017995 | SH3PXD2B |
| NM_017798    | YTHDF1   |
| NM_001080477 | TENM3    |
| NM_012098    | ANGPTL2  |
| NM_012341    | GTPBP4   |
| NM_015315    | LARP1    |
| NM_001283    | AP1S1    |
| NM_004525    | LRP2     |
| NM_031918    | KLF16    |
| NM_025090    |          |

|              |          |
|--------------|----------|
| NM_014865    | NCAPD2   |
| NM_015131    | WDR43    |
| NM_002293    | LAMC1    |
| NM_000435    | NOTCH3   |
| NM_004491    | ARHGAP35 |
| NM_014681    | DHX34    |
| NM_170606    | KMT2C    |
| NM_001010854 | TTC7B    |
| NM_020979    | SH2B2    |
| NM_014584    | ERO1A    |
| NM_000291    | PGK1     |
| NM_057175    | NAA15    |
| NM_004907    | IER2     |
| NM_014616    | ATP11B   |
| NM_002428    | MMP15    |
| NM_152230    | IPMK     |
| NM_019593    | GPCPD1   |
| NM_057749    | CCNE2    |
| NM_020702    | MYORG    |
| NM_015123    | FRMD4B   |
| NM_018697    | LANCL2   |
| NM_007124    | UTRN     |
| NM_014331    | SLC7A11  |
| NM_020733    | HEG1     |
| NM_006305    | ANP32A   |
| NM_020343    | RALGAPA2 |
| NM_012382    | TTC33    |
| NM_002111    | HTT      |
| NM_002773    | PRSS8    |
| NM_003966    | SEMA5A   |
| NM_032860    | LTV1     |
| NM_014935    | PLEKHA6  |
| NM_016530    | RAB8B    |
| NM_006029    | PNMA1    |
| NM_001067    | TOP2A    |
| NM_016133    | INSIG2   |
| NM_177538    | CYP20A1  |

|              |         |
|--------------|---------|
| NM_004289    | NFE2L3  |
| NM_002372    | MAN2A1  |
| NM_001271    | CHD2    |
| NM_004237    | TRIP13  |
| NM_006828    | ASCC3   |
| NM_006343    | MERTK   |
| NM_001256071 | RNF213  |
| NM_021203    | SRPRB   |
| NM_001308147 | PLEKHG3 |
| NM_022166    | XYLT1   |
| NM_033274    | ADAM19  |
| NM_006513    | SARS1   |
| NM_002824    | PTMS    |
| NM_015074    | KIF1B   |
| NM_016183    | MRTO4   |
| NM_005120    | MED12   |
| NM_020357    | PCNP    |
| NM_001042414 | PSPC1   |
| NM_001080450 | BEND3   |
| NM_005990    | STK10   |
| NM_015033    | FNBP1   |
| NM_017934    | PHIP    |
| NM_020774    | MIB1    |
| NM_024602    | HECTD3  |
| NM_015562    | UBXN7   |
| NM_002755    | MAP2K1  |
| NM_017643    | MBTD1   |
| NM_080677    | DYNLL2  |
| NM_004878    | PTGES   |
| NM_013319    | UBIAD1  |
| NM_022366    | TFB2M   |
| NM_032221    | CHD6    |
| NM_007225    | NXPH3   |
| NR_037427    | MIR3654 |
| NM_016243    | CYB5R1  |
| NM_001551    | IGBP1   |
| NM_018011    | ARGLU1  |

|              |         |
|--------------|---------|
| NM_015306    | USP24   |
| NM_014597    | DNTTIP2 |
| NM_022917    | NOL6    |
| NM_002871    | RABIF   |
| NM_005220    | DLX3    |
| NM_015457    | ZDHHC5  |
| NM_145307    | RTKN2   |
| NM_001031711 | ERGIC1  |
| NM_001101    | ACTB    |
| NM_015474    | SAMHD1  |
| NM_005044    | PRKX    |
| NM_005736    | ACTR1A  |
| NM_138809    | CMBL    |
| NM_014611    | MDN1    |
| NM_015104    | ATG2A   |
| NM_147128    | ZNRF2   |
| NM_001017964 | YDJC    |
| NM_001690    | ATP6V1A |
| NM_001861    | COX4I1  |
| NM_053056    | CCND1   |
| NM_024334    | TMEM43  |
| NM_005066    | SFPQ    |
| NM_005642    | TAF7    |
| NM_012479    | YWHAG   |
| NM_017882    | CLN6    |
| NM_015056    | RRP1B   |
| NM_002687    | PNN     |
| NM_002999    | SDC4    |
| NM_013285    | GNL2    |
| NM_018351    | FGD6    |
| NM_002077    | GOLGA1  |
| NM_006784    | WDR3    |
| NM_014851    | KLHL21  |
| NM_001404    | EEF1G   |
| NM_003276    | TMPO    |
| NM_014390    | SND1    |
| NM_003489    | NRIP1   |

|              |         |
|--------------|---------|
| NM_020947    | MEAK7   |
| NM_001303095 | ISG20L2 |
| NM_025077    | TOE1    |
| NM_032329    | ING5    |
| NM_203453    | PLPP6   |
| NM_175058    | PLEKHA7 |
| NM_016252    | BIRC6   |
| NM_003370    | VASP    |
| NM_006526    | ZNF217  |
| NM_005184    | CALM3   |
| NM_002205    | ITGA5   |
| NM_002079    | GOT1    |
| NM_006773    | DDX18   |
| NM_021194    | SLC30A1 |
| NM_005253    | FOSL2   |
| NM_003222    | TFAP2C  |
| NM_020459    | PAIP2B  |
| NM_016343    | CENPF   |
| NM_152307    | TRMT61A |
| NM_022491    | SUDS3   |
